# Supplementary material for: Electrochemical determination of trichloroacetic acid using an ionic liquid functionalized graphene–AgPd alloy nanoparticle composite modified electrode with the enhancement effect of cetyltrimethylammonium bromide
Source: Royal Society of Chemistry journal article supplement (doi:10.1039/c3ay41286e), 2013-01-01
Supplement: c3ay41286e.pdf [file c3ay41286e.pdf]

## Supplementary Information

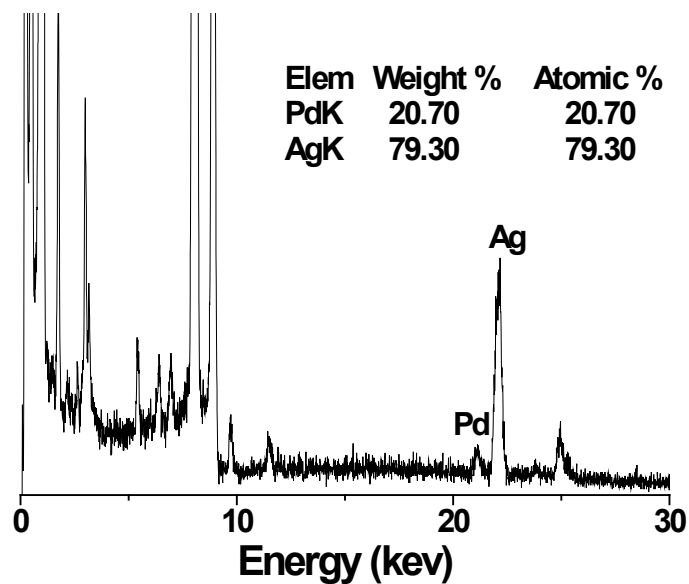

Fig. S1. EDS of Ag<sub>4</sub>Pd<sub>1</sub> alloy nanoparticles

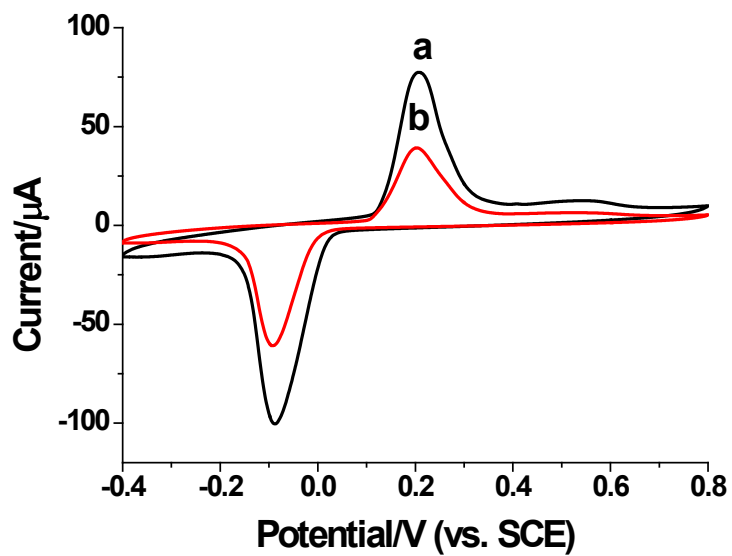

Fig. S2. Cyclic voltammograms of IL-GN-Ag<sub>4</sub>Pd<sub>1</sub>/GCE (a) and Ag<sub>4</sub>Pd<sub>1</sub>/GCE (b) in 0.1 M PBS (pH = 7.0). Scan rate: 50 mV/s.

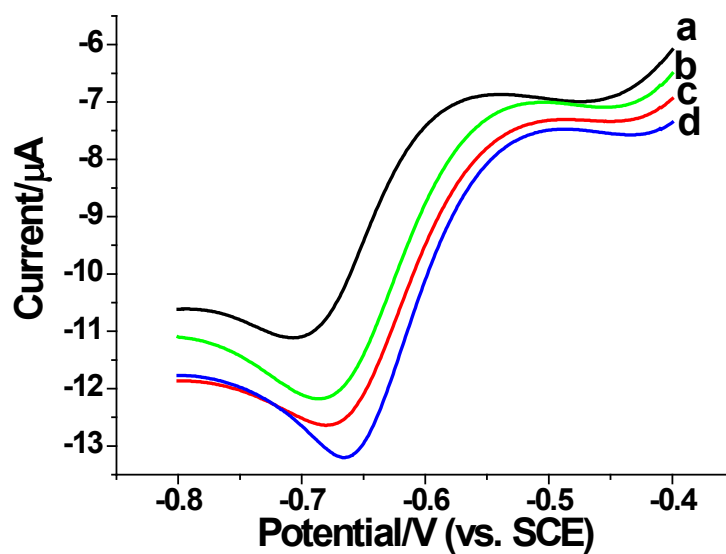

**Fig. S3.** Linear sweep voltammograms of IL-GN-Ag/GCE (a), IL-GN-Ag<sub>2</sub>Pd<sub>1</sub>/GCE (b), IL-GN-Ag<sub>6</sub>Pd<sub>1</sub>/GCE (c) and IL-GN-Ag<sub>4</sub>Pd<sub>1</sub>/GCE (d) in 0.1 M PBS (pH 7.0) solution containing 25 μM TCA and 80 μM CTAB. Scan rate: 50 mV/s.

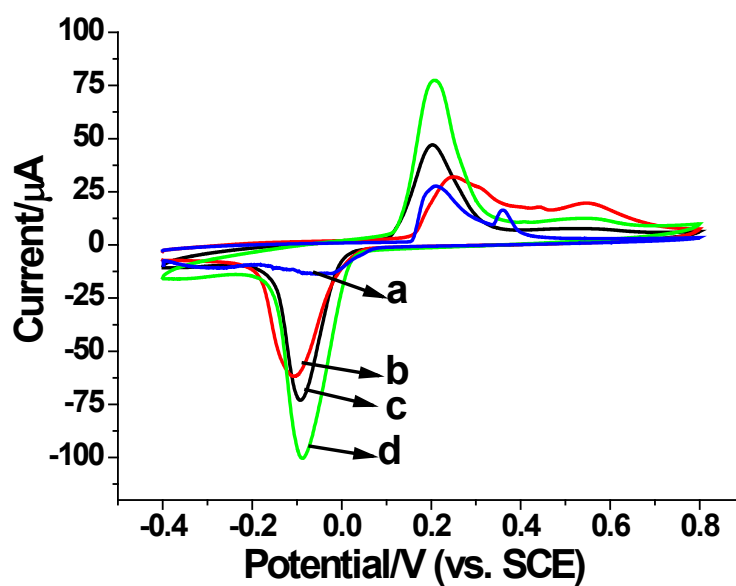

**Fig. S4.** Cyclic voltammograms of IL-GN-Ag/GCE (a), IL-GN-Ag<sub>2</sub>Pd<sub>1</sub>/GCE (b), IL-GN-Ag<sub>6</sub>Pd<sub>1</sub>/GCE (c) and IL-GN-Ag<sub>4</sub>Pd<sub>1</sub>/GCE (d) in 0.1 M PBS (pH = 7.0). Scan rate: 50 mV/s.

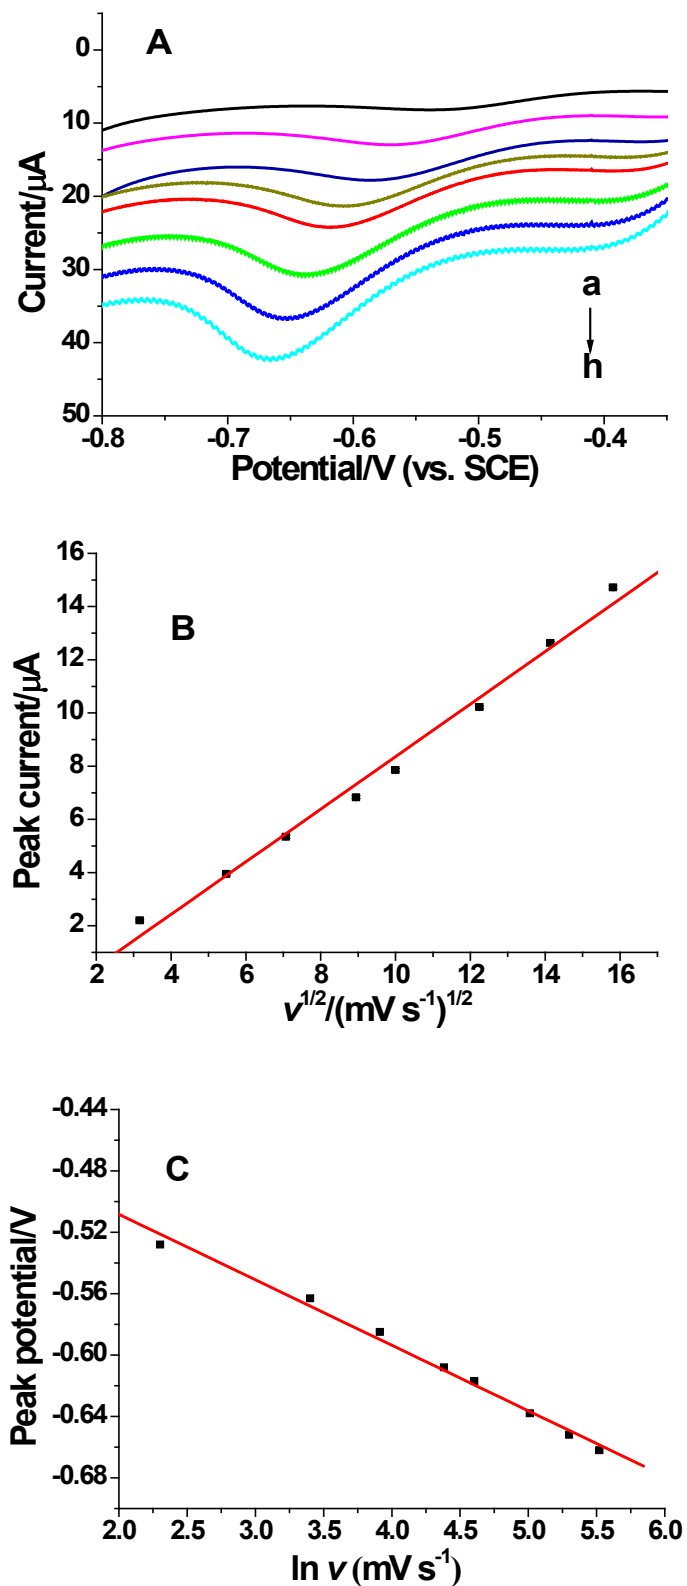

**Fig. S5.** (A) LSVs of TCA on IL-GN-Ag<sub>4</sub>Pd<sub>1</sub>/GCE at different scan rates. Scan rate ( $\text{mV/s}$ ): 10 (a), 30 (b), 50 (c), 80 (d), 100 (e), 150 (f), 200 (g) and 250 (h). (B) Variation of peak current with  $v^{1/2}$ . (C) Variation of peak potential with  $\ln v$ .

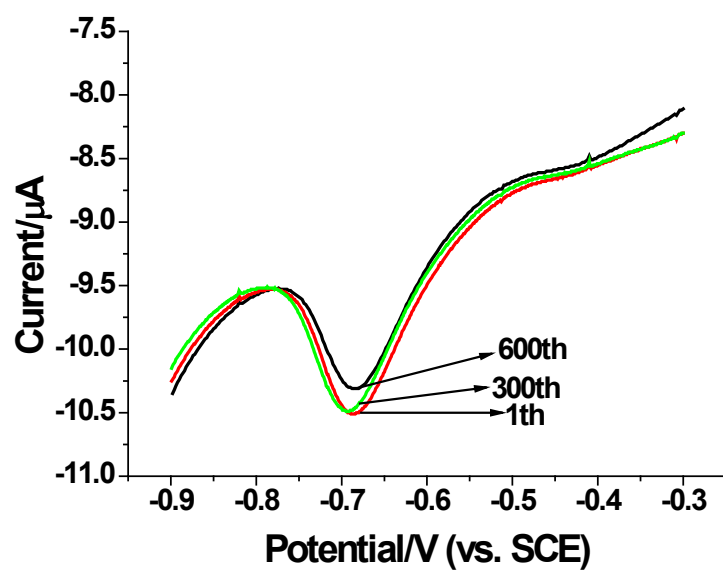

**Fig. S6.** Linear sweep voltammograms of IL-GN-Ag<sub>4</sub>Pd<sub>1</sub>/GCE in 0.1 M PBS (pH 7.0) containing 5 μM TCA and 80 μM CTAB. Scan rate: 50 mV/s. Labeled in the figure is the number of measurement.
